# Supplementary material for: High-risk histological subtype-related FAM83A hijacked FOXM1 transcriptional regulation to promote malignant progression in lung adenocarcinoma
Source: PeerJ. 2023 Oct 26;11:e16306. doi: 10.7717/peerj.16306 (PMC10613442; doi:10.7717/peerj.16306)
Supplement: Supplemental Information 3 [file peerj-11-16306-s003.xlsx]

## Sheet: Figure 2
Figure 2A														Figure 2C A549
		Rep1	Rep2	Rep3											Mock			FAM83A
	HBE	1	1	1										0h	1	1	1	1	1	1
	A549	2.421	2.053	2.245										12h	1.053	1.163	1.255	1.242	1.165	1.2576
	PC9	4.053	4.212	3.854										24h	1.531	1.595	1.42	1.668	1.853	1.942
	H1975	2.535	2.634	2.853										36h	1.489	1.6342	1.5639	2.563	2.776	2.321
	A427	3.214	3.103	3.435										48h	2.432	1.953	2.053	3.153	3.26	2.763
	H358	2.953	2.539	2.753										60h	2.865	2.353	2.21	3.502	3.79	3.886
	DV90	3.242	2.953	3.145										72h	3.53	3.853	3.004	4.123	4.253	3.853
Figure 2B &Supplementary Figure S2A														Figure 2C PC9
	sgNC			sgFAM83A			Mock			FAM83A					sgNC			sgFAM83A
A549	153	126	110	26	18	47	149	109	166	323	296	363		0h	1	1	1	1	1	1
PC9	52	77	34	9	12	21	57	47	65	253	196	226		12h	1.24	1.11	1.18	1.024	1.105	1.06
														24h	1.28	1.45	1.36	1.105	1.084	1.201
Figure 2D &Supplementary Figure S2B														36h	1.64	1.56	1.57	1.1053	1.163	1.23
	sgNC			sgFAM83A			Mock			FAM83A				48h	1.94	2.19	2.22	1.253	1.2356	1.1024
EdU+ Number	18	258	308	5	2	8	4	30	60	110	108	101		60h	2.67	2.31	2.87	1.356	1.45	1.592
DAPI+ Number	440	421	433	468	461	485	450	423	491	466	420	464		72h	3.65	3.21	3.51	1.853	1.603	1.953
Figure 2E & Supplementary Figure S2C
	sgNC			sgFAM83A			Mock			FAM83A
A549	196	224	254	63	48	79	196	157	176	325	452	398
PC9	177	210	189	58	69	106	196	252	228	314	365	289
Figure 2F & Supplementary Figure S2D
	sgNC			sgFAM83A
PC9	145	129	162	87	66	93
	Mock			FAM83A
A549	46	61	38	274	305	296

## Sheet: Figure 3
Figure 3B				Figure 3C
	sgNC	sgFAM83A			sgNC					sgFAM83A
	9	66		D0	0	0	0	0	0	0	0	0	0	0
	22	76		D2	3.8	2.8	2.8	3.2	2.5	1.2	1.4	1.3	1.6	0.9
	14	46		D4	6.7	3.6	5.3	5	4.6	4	2.3	3.6	3	2.8
	10	57		D6	8.3	7.5	6.8	4.4	5.2	4.8	3.7	3.9	4.2	4.7
	12	66		D8	8.3	9.9	5.3	6.7	5.9	6.3	3.8	4.5	5.1	5.8
	23	65		D10	13.8	10.5	6.2	9.2	7.8	7.3	3.8	5.7	6.5	4.7
	19	73		D12	15	8.8	12.4	7.9	13.6	8.8	3.9	6.8	7.4	5.5
	4	79
	14	98		Figure 3E
	29	68			sgNC					sgFAM83A
	15	56		FAM83A	12	12	9	9	8	2	1	1	1	0
	12	64		Ki-67	9	9	8	6	6	6	3	4	2	2
	26	56
	10	79
	24	73
	19	64

## Sheet: Figure 4
Figure 4E
	sgNC			sgFAM83A			Mock			FAM83A
CDC6	1	1	1	0.423	0.446	0.514	1.1045	1.024	0.953	2.153	2.0534	1.8563
CDC20	1	1	1	0.734	0.696	0.651	1.253	1.156	1.042	1.953	2.153	2.224
CEBPA	1	1	1	0.392	0.423	0.44	0.9531	0.887	0.856	1.554	1.524	1.659
CDKN3	1	1	1	0.531	0.45	0.634	1.245	1.22	1.186	2.4532	2.438	2.159
Figure 4G
	sgNC			sgFAM83A			Mock			FAM83A
G1	50.3	62.4	56.5	78.9	73.4	71.6	55.4	49.7	45.1	49.3	42.6	38.9
G2	12.6	11	10.6	4.8	5.7	6.9	15.7	17.4	20.3	28.7	20.4	24.9
S	37.1	26.6	32.9	16.3	20.9	21.5	28.9	32.9	34.6	22	37	36.2
									`

## Sheet: Figure 5
Figure 5B
	IgG			anti-Flag
-2000~-1500	0.28778	0.30423	0.52679	0.71414	0.77734	1.2698
-1500~-1000	0.94649	0.89103	0.52685	1.07915	1.49677	1.7247
-1000~-500	0.28772	0.16067	0.03203	1.67344	1.95161	2.265
-500~TSS	0.5805	0.55115	0.75969	6.71996	5.88543	5.44877
Figure5C
	Mock			FAM83A
-2000~TSS	1	1	1	2.53	2.31	2.21
-1500~TSS	0.99	0.95	0.89	2	2.59	1.88
-1000~TSS	0.84	0.76	0.9	1.78	1.87	1.57
-500~TSS	0.66	0.59	0.52	0.7	0.88	0.65

## Sheet: Figure 6
Figure 6A & Supplementary Figure S3A & Supplementary Figure S3B
	sgNC+Mock			sgFAM83A+Mock			sgFAM83A+FOXM1
	29	42	35	9	12	17	54	48	70
	Mock+siCtrl			FAM83A+siCtrl			FAM83A+siFOXM1
	39	43	34	67	79	83	8	11	15
Figure 6B
	sgNC+Mock			sgFAM83A+Mock			sgFAM83A+FOXM1
G1	56.9	51.3	48.5	73.2	75.8	70.5	42.3	44.1	40.7
G2	18.9	16.5	14.8	8.3	7.5	7	17.6	18.6	20.1
S	24.2	32.2	36.7	18.5	16.7	22.5	40.1	37.3	39.2
	Mock+siCtrl			FAM83A+siCtrl			FAM83A+siFOXM1
G1	50.6	52	49.3	46.2	43.2	40.7	73.5	71.8	74.8
G2	12.6	15.9	16.6	22.5	20.6	18.9	5.8	7.3	8.5
S	36.8	32.1	34.1	31.3	36.2	40.4	20.7	20.9	16.7
Figure 6C & Supplementary Figure S3C
	Mock+DMSO			Mock+Palb			FAM83A+DMSO			FAM83A+Pabl
	79	62	70	58	49	44	169	205	197	26	36	31
Figure 6D
	Mock+DMSO			Mock+Palb			FAM83A+DMSO			FAM83A+Pabl
G1	55.3	50.7	46.9	43.1	41.8	39	68.7	71.2	73.7	40.6	38.6	36.4
G2	13.3	13.2	11.8	18.4	17.4	16.6	5.3	7.4	9.4	19.5	21.5	21.9
S	31.4	36.1	41.3	38.5	40.8	44.4	26	21.4	16.9	39.9	39.9	41.7

## Sheet: Figure 7
Figure 7B				Figure 7C
	High-expression	12			High-expression						Low-expression
		9		Ki67	12	9	9	9	9	8	6	6	6	4	4	2
		8		FOXM1	9	8	8	6	6	6	4	3	2	2	1	1
		12
		9
		9
	Low-expression	4
		6
		4
		2
		4
		2
